# Supplementary material for: Theoretical investigation on the nature of substituted benzene⋯AuX interactions: covalent or noncovalent?
Source: Royal Society of Chemistry journal article supplement (doi:10.1039/d1nj05328k), 2022-01-01
Supplement: d1nj05328k1.pdf [file d1nj05328k1.pdf]

Electronic Supplementary Material (ESI) for New Journal of Chemistry

Theoretical investigation on the nature of substituted benzene···AuX  
interactions: covalent or noncovalent?

Aiting Shan,<sup>a</sup> Xiaoyan Li,<sup>a</sup> Yanli Zeng,<sup>a</sup> Lingpeng Meng<sup>a</sup> and Xueying Zhang<sup>\*a</sup>

|                                                                                                                                                                               |   |
|-------------------------------------------------------------------------------------------------------------------------------------------------------------------------------|---|
| Figure S1 Optimized geometries of the complexes .....                                                                                                                         | 2 |
| Figure S2 Relationships between binding energies $\Delta E$ and equilibrium distance $R_{\perp}$ for the $\pi$ ···AuX complexes.....                                          | 3 |
| Figure S3 Relationships between binding energies $\Delta E$ and electron density $\rho_b$ or its Laplacian $\nabla^2\rho_b$ at the C···Au BCPs or RCPs in the complexes ..... | 3 |
| Figure S4 Relationships between delocalization index $\delta(A, B)$ and Wiberg bond index $WBI_{Au-C}$ for the complexes.....                                                 | 4 |
| Figure S5 Computed density difference plots for the complexes TFB···AuX.....                                                                                                  | 5 |
| Figure S6 Computed density difference plots for the complexes HFB···AuX.....                                                                                                  | 6 |

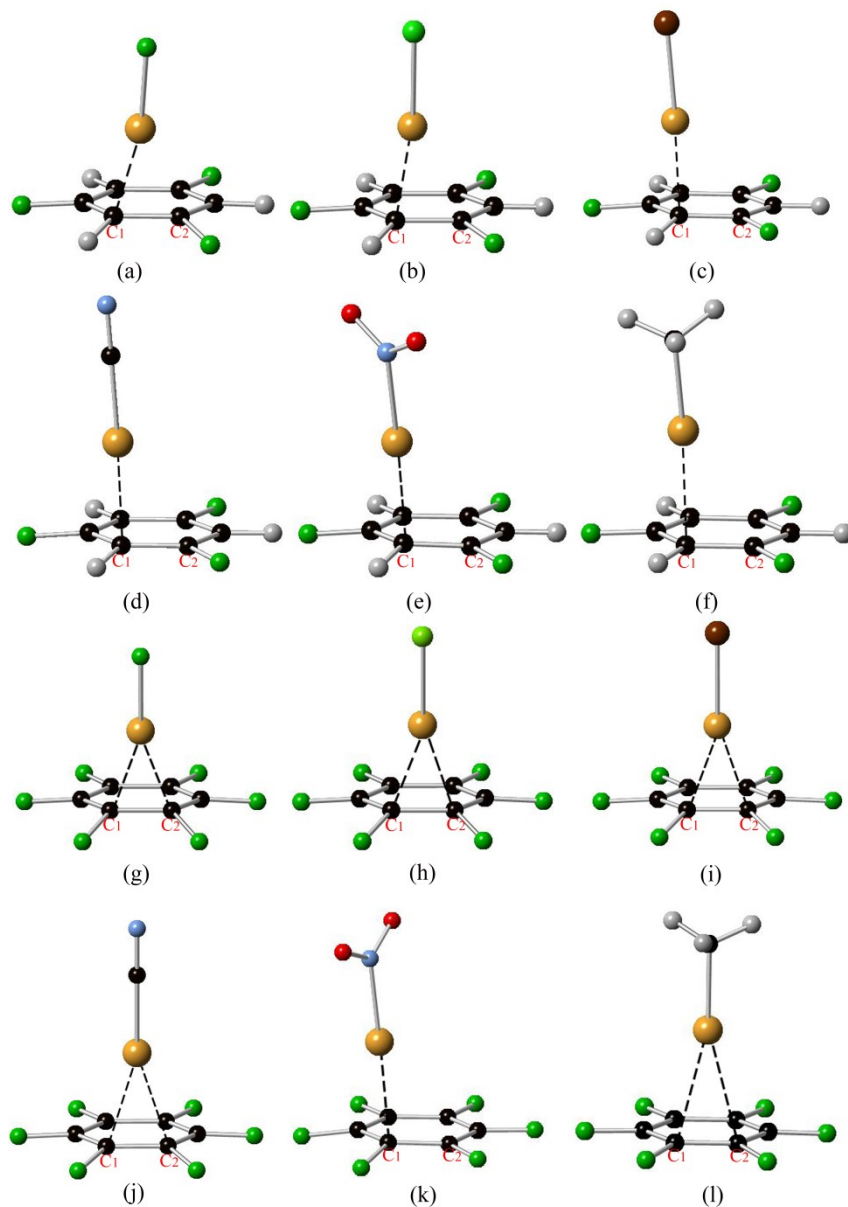

**Figure S1** Optimized geometries of the complexes: (a) TFB $\cdots$ AuF, (b) TFB $\cdots$ AuCl, (c) TFB $\cdots$ AuBr, (d) TFB $\cdots$ AuCN, (e) TFB $\cdots$ AuNO<sub>2</sub>, (f) TFB $\cdots$ AuCH<sub>3</sub>, (g) HFB $\cdots$ AuF, (h) HFB $\cdots$ AuCl, (i) HFB $\cdots$ AuBr, (j) HFB $\cdots$ AuCN, (k) HFB $\cdots$ AuNO<sub>2</sub>, (l) HFB $\cdots$ AuCH<sub>3</sub>

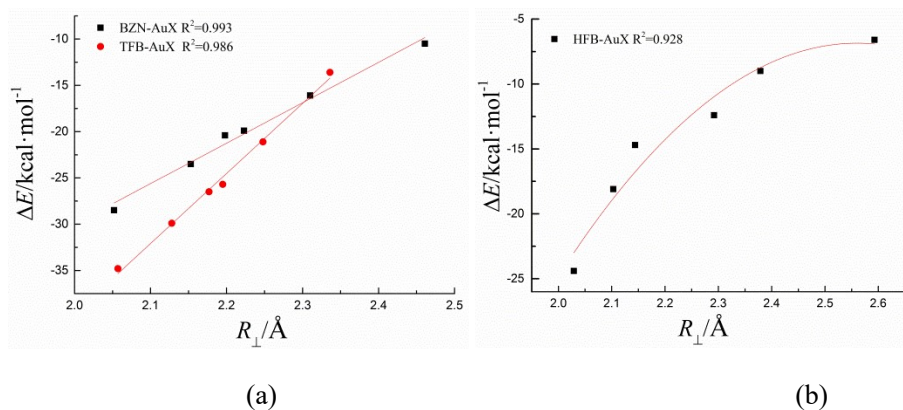

**Fig. S2** Relationships between binding energies  $\Delta E$  and equilibrium distance  $R_{\perp}$  for the  $\pi\cdots\text{AuX}$  complexes (a) BZN···AuX and TFB···AuX (b) HFB···AuX

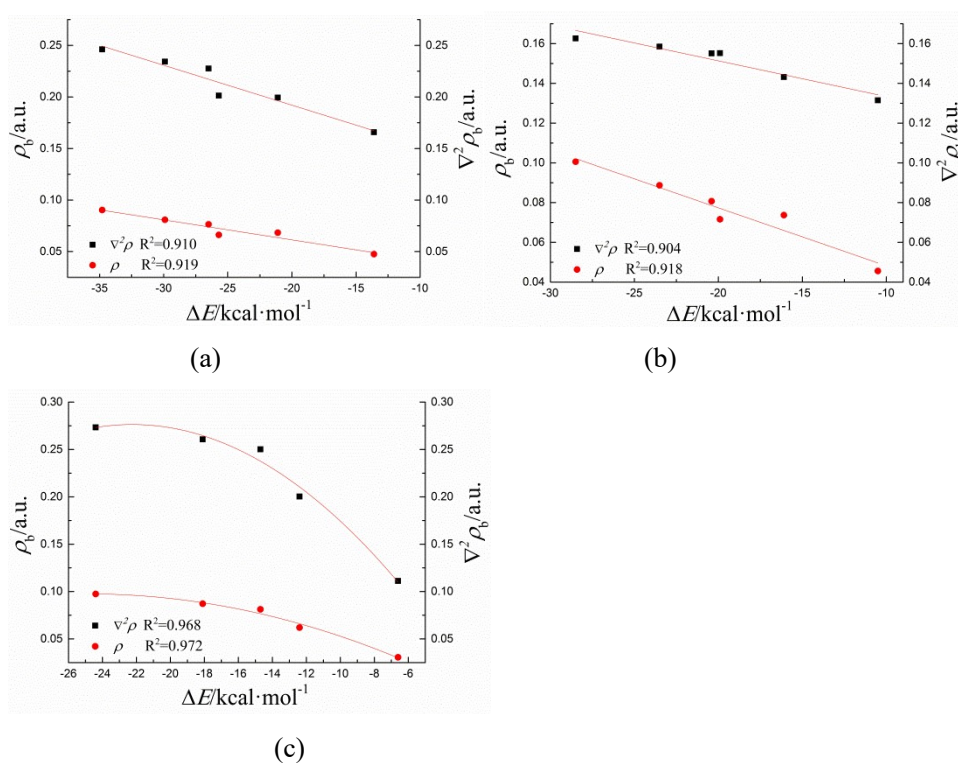

**Fig. S3** Relationships between binding energies  $\Delta E$  and electron density  $\rho_b$  or its Laplacian  $\nabla^2\rho_b$  at the C···Au BCPs or RCPs in the complexes (a) BZN···AuX (b) TFB···AuX (c) HFB···AuX

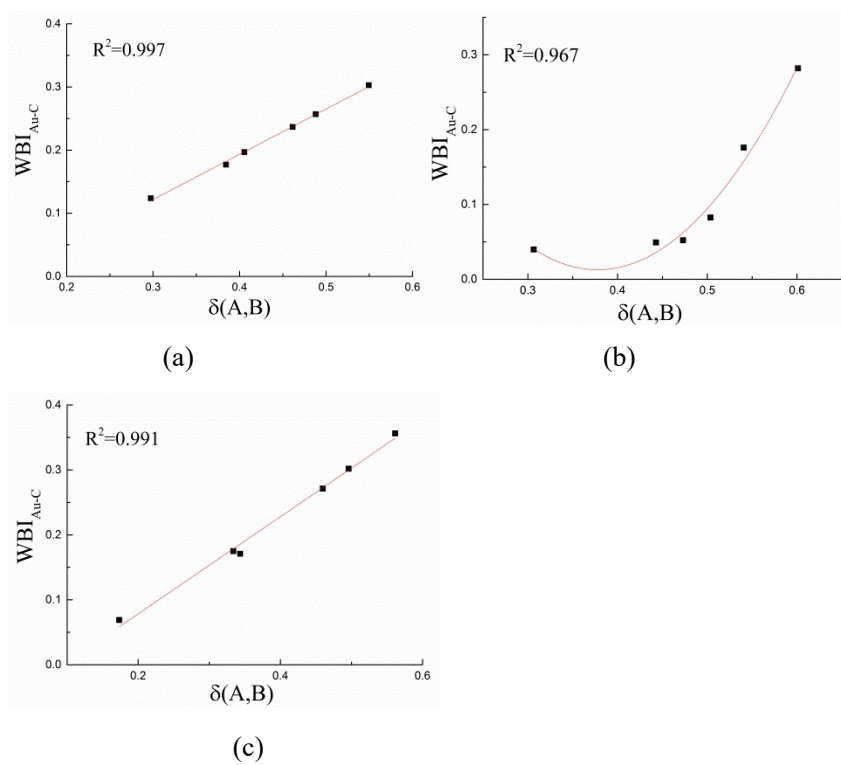

**Fig. S4** Relationships between delocalization index  $\delta(A, B)$  and Wiberg bond index  $WBI_{Au-C}$  for the complexes (a)  $BZN \cdots AuX$  (b)  $TFB \cdots AuX$  (c)  $HFB \cdots AuX$

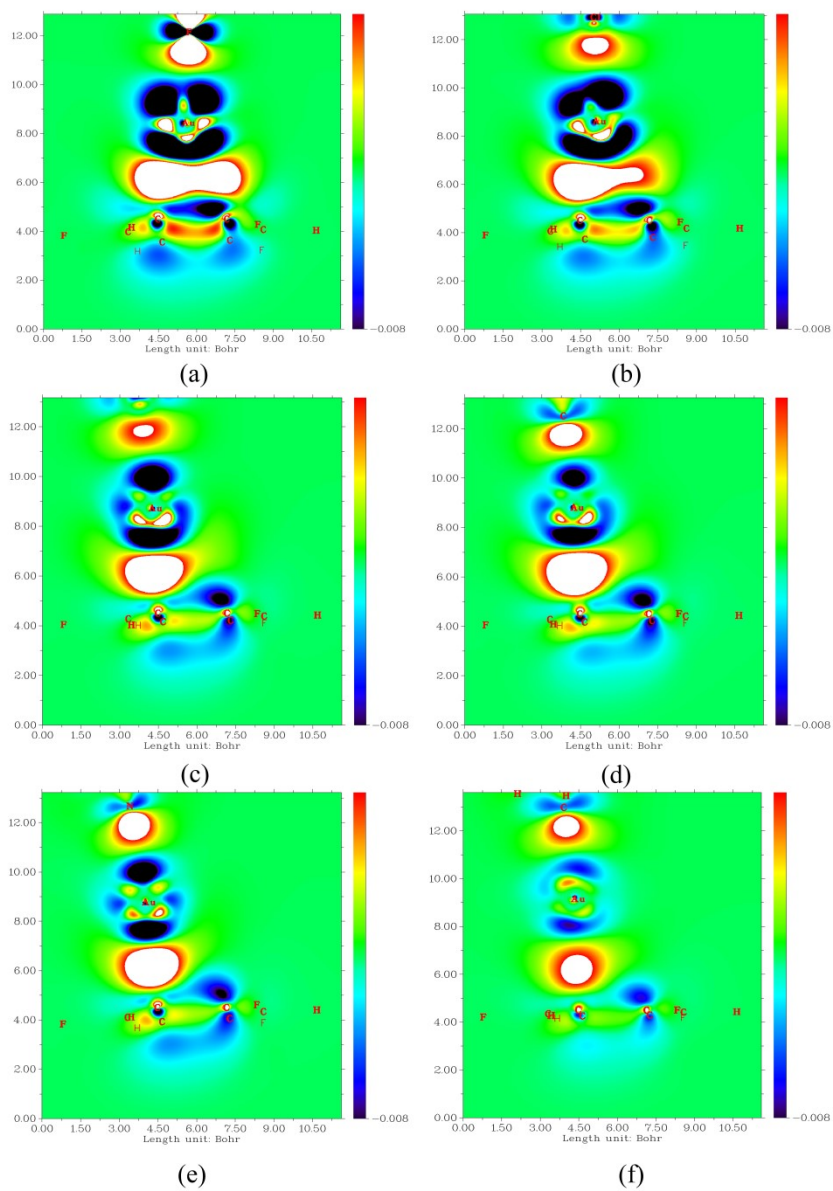

**Fig. S5** Computed density difference plots for the complexes TFB···AuX. (a) TFB···AuF, (b) TFB···AuCl, (c) TFB···AuBr, (d) TFB···AuCN, (e) TFB···AuNO<sub>2</sub>, (f) TFB···AuCH<sub>3</sub>

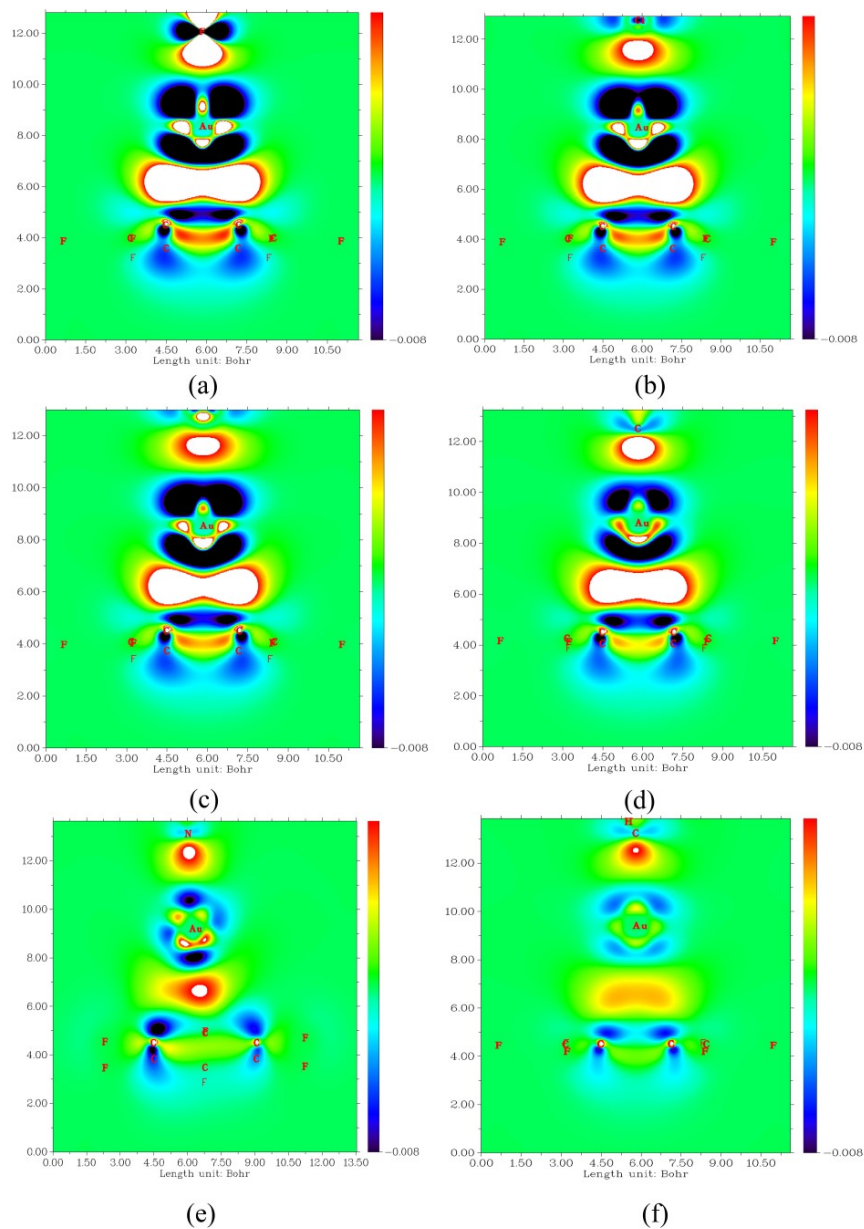

**Fig. S6** Computed density difference plots for the complexes HFB $\cdots$ AuX. (a) HFB $\cdots$ AuF; (b) HFB $\cdots$ AuCl; (c) HFB $\cdots$ AuBr; (d) HFB $\cdots$ AuCN; (e) HFB $\cdots$ AuNO<sub>2</sub>; (f) HFB $\cdots$ AuCH<sub>3</sub>.
